# Supplementary material for: CD8+γδ T Cells Are More Frequent in CMV Seropositive Bone Marrow Grafts and Display Phenotype of an Adaptive Immune Response
Source: Hindawi journal article supplement (doi:10.1155/2019/6348060), 2019-12-06

Table S1 primers for Spectratyping

| primer          | Sequence 5`-3`                |
|-----------------|-------------------------------|
| V $\gamma$ 2    | GCAAGCACAAGGAASAACCTTGAG      |
| V $\gamma$ 3    | GTACTATGACGTCTCCACCG          |
| V $\gamma$ 4    | ATGACTCCTACACCTCCAGC          |
| V $\gamma$ 5    | CCCAGGAGGTGGAGCTGGAT          |
| V $\gamma$ 9    | ATCAACGCTGGCAGTCC             |
| V $\delta$ 1    | CTGTCAACTTCAAGAAA-GCAGCGAAATC |
| C $\gamma$ -FAM | AATAGTGGGCTTGGGGGAAAC         |
| C $\delta$ -FAM | ACGGATGGTTTGGTATGAG GCTGA     |



MMS\_CD8+\_g2\_A01\_TCRgd\_191 Analyzed Data

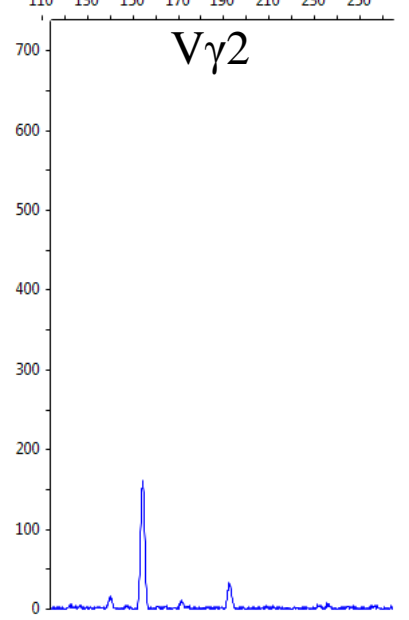

MMS\_CD8+\_g3\_B01\_TCRgd\_191 Analyzed Data

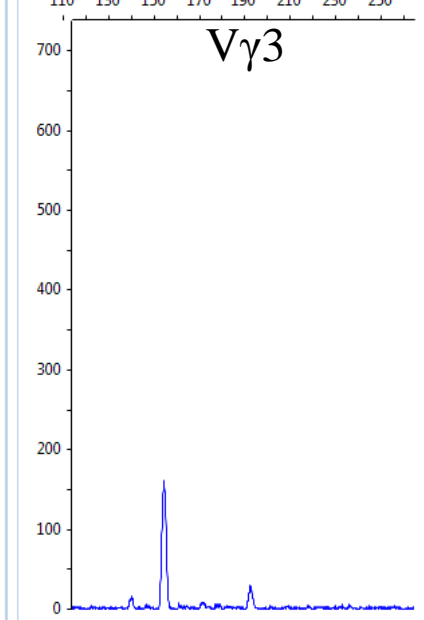

MMS\_CD8+\_g4\_C01\_TCRgd\_191 Analyzed Data

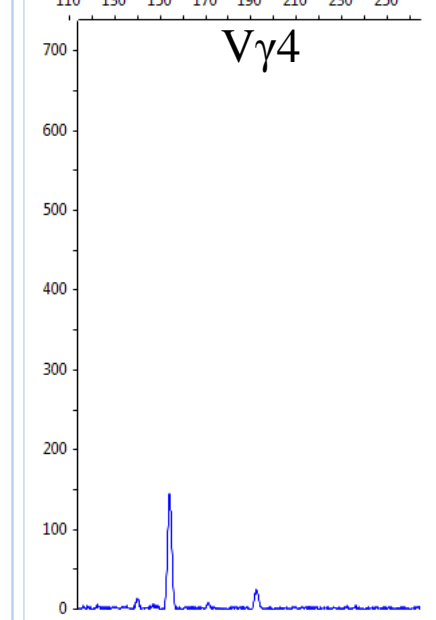

MMS\_CD8+\_g5\_D01\_TCRgd\_191 Analyzed Data

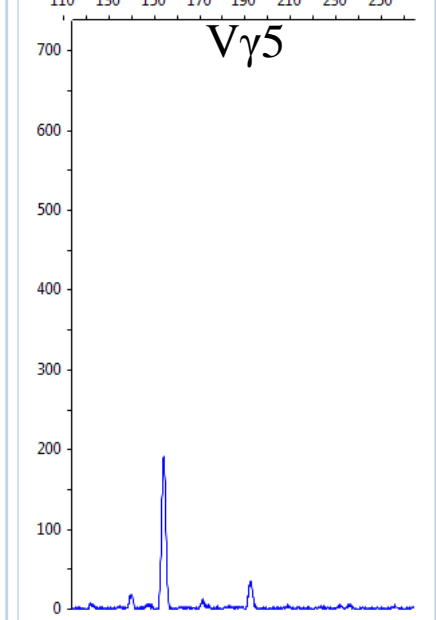

MMS\_CD8+\_g9\_E01\_TCRgd\_191 Analyzed Data

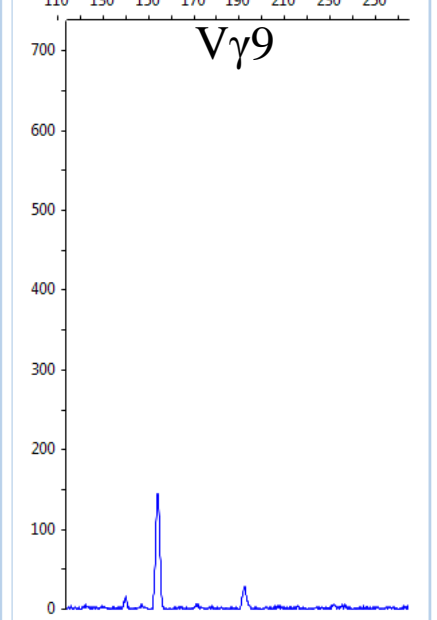

MMS\_CD8+\_VD1\_F01\_TCRgd\_19 Analyzed Data

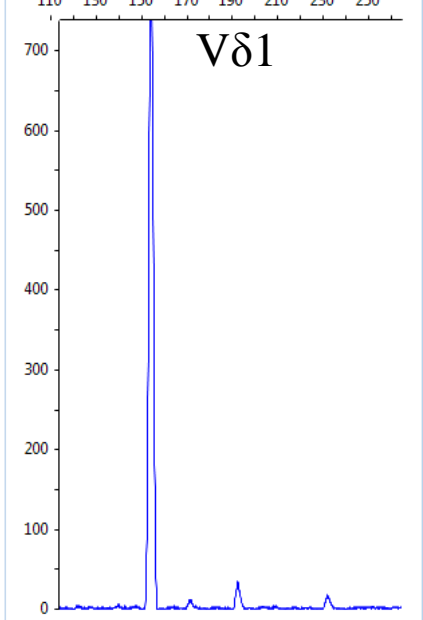

MMS\_CD8--\_g2\_A02\_TCRgd\_191 Analyzed Data

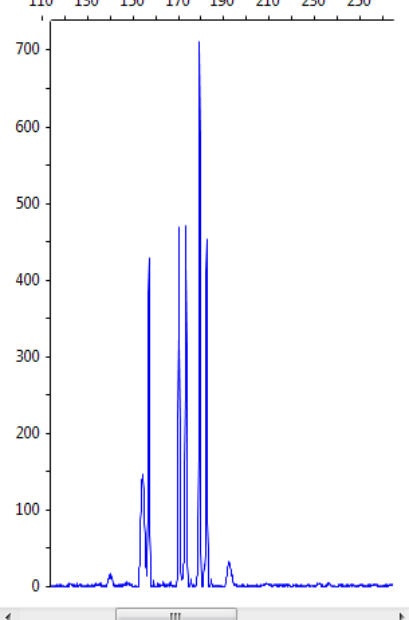

MMS\_CD8--\_g3\_B02\_TCRgd\_191 Analyzed Data

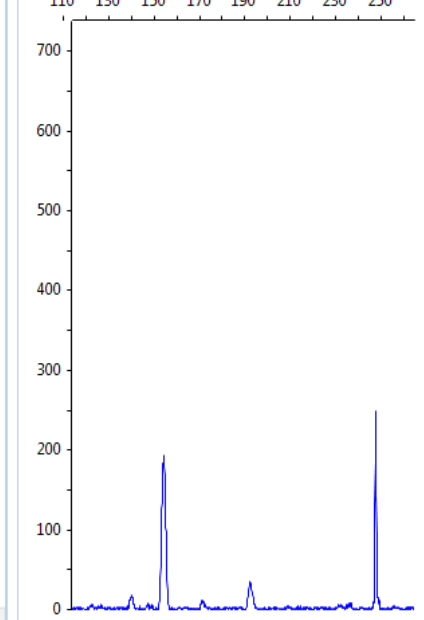

MMS\_CD8--\_g4\_C02\_TCRgd\_191 Analyzed Data

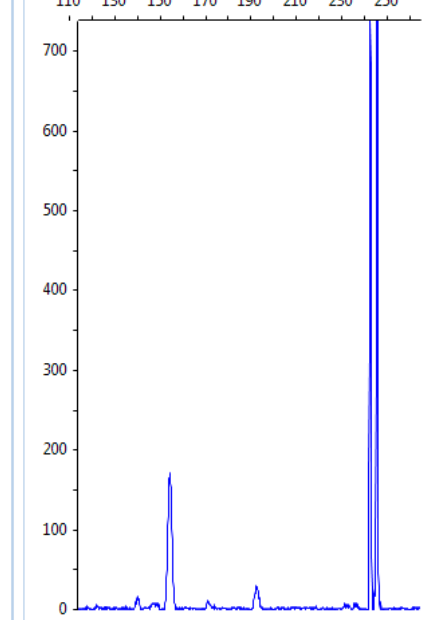

MMS\_CD8--\_g5\_D02\_TCRgd\_191 Analyzed Data

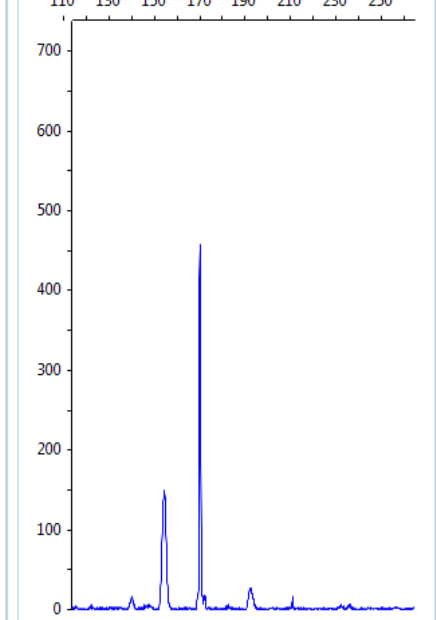

MMS\_CD8--\_g9\_E02\_TCRgd\_191 Analyzed Data

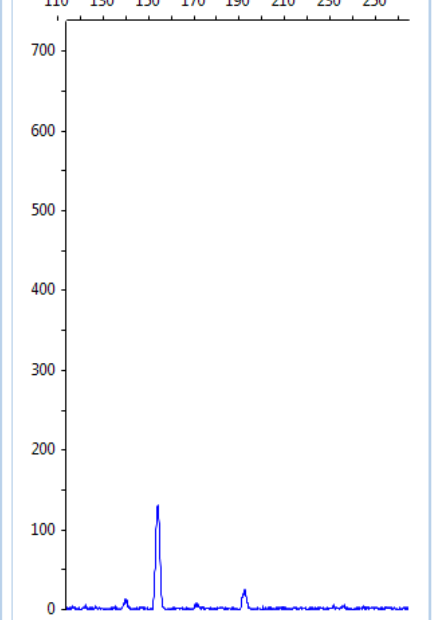

MMS\_CD8--\_VD1\_F02\_TCRgd\_19 Analyzed Data

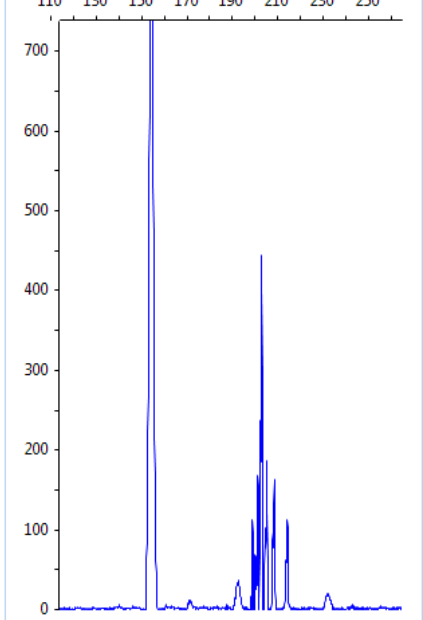

Supplement: f1 [file 6348060.f1.pdf]
